# Supplementary material
Source: PubMed Central journal article supplement (PMC2796371)
Supplement: NIHMS157407-supplement-02.pdf [file NIHMS157407-supplement-02.pdf]

**Supplemental Table 1****Genotyping of offspring from miR-499<sup>+/-</sup> intercrosses**

| Genotype     | +/+ | +/- | -/- |
|--------------|-----|-----|-----|
| Observed no: | 30  | 41  | 26  |
| Observed %:  | 31  | 42  | 27  |
| Expected %:  | 25  | 50  | 25  |

**Supplemental Table 2****Genotyping of offspring from miR-208b<sup>+/-</sup> intercrosses**

| Genotype     | +/+ | +/- | -/- |
|--------------|-----|-----|-----|
| Observed no: | 28  | 42  | 19  |
| Observed %:  | 31  | 47  | 22  |
| Expected %:  | 25  | 50  | 25  |

**Supplemental Table 3****Genotyping of offspring from miR-499<sup>+/-</sup>/miR-208b<sup>+/-</sup> intercrosses**

| Genotype     | 1    | 2    | 3    | 4    | 5    | 6    | 7    | 8    | 9    |
|--------------|------|------|------|------|------|------|------|------|------|
| miR-499      | +/+  | +/+  | +/-  | +/-  | -/-  | -/-  | -/-  | +/-  | +/+  |
| miR-208b     | +/+  | +/-  | +/+  | +/-  | +/+  | +/-  | -/-  | -/-  | -/-  |
| Observed no: | 6    | 4    | 8    | 10   | 3    | 4    | 6    | 5    | 6    |
| Observed %:  | 11.5 | 7.6  | 15.4 | 19.2 | 5.8  | 7.7  | 11.5 | 9.6  | 11.5 |
| Predicted %: | 6.25 | 12.5 | 12.5 | 25.0 | 6.25 | 12.5 | 6.25 | 12.5 | 6.25 |
