# Supplementary material
Source: PubMed Central journal article supplement (PMC2796371)

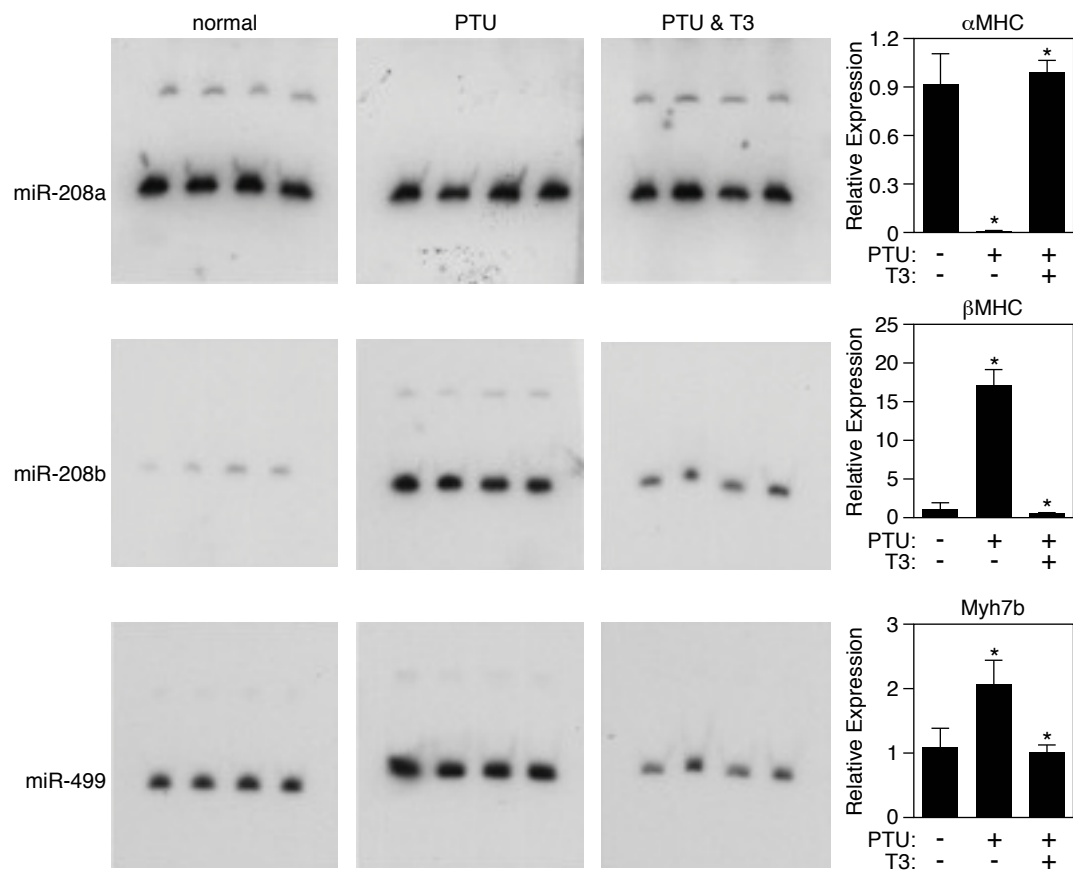

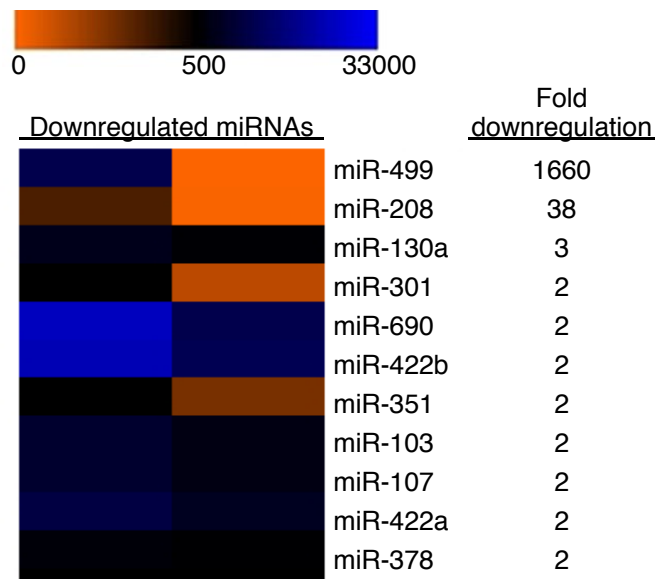

Supp. Figure 2

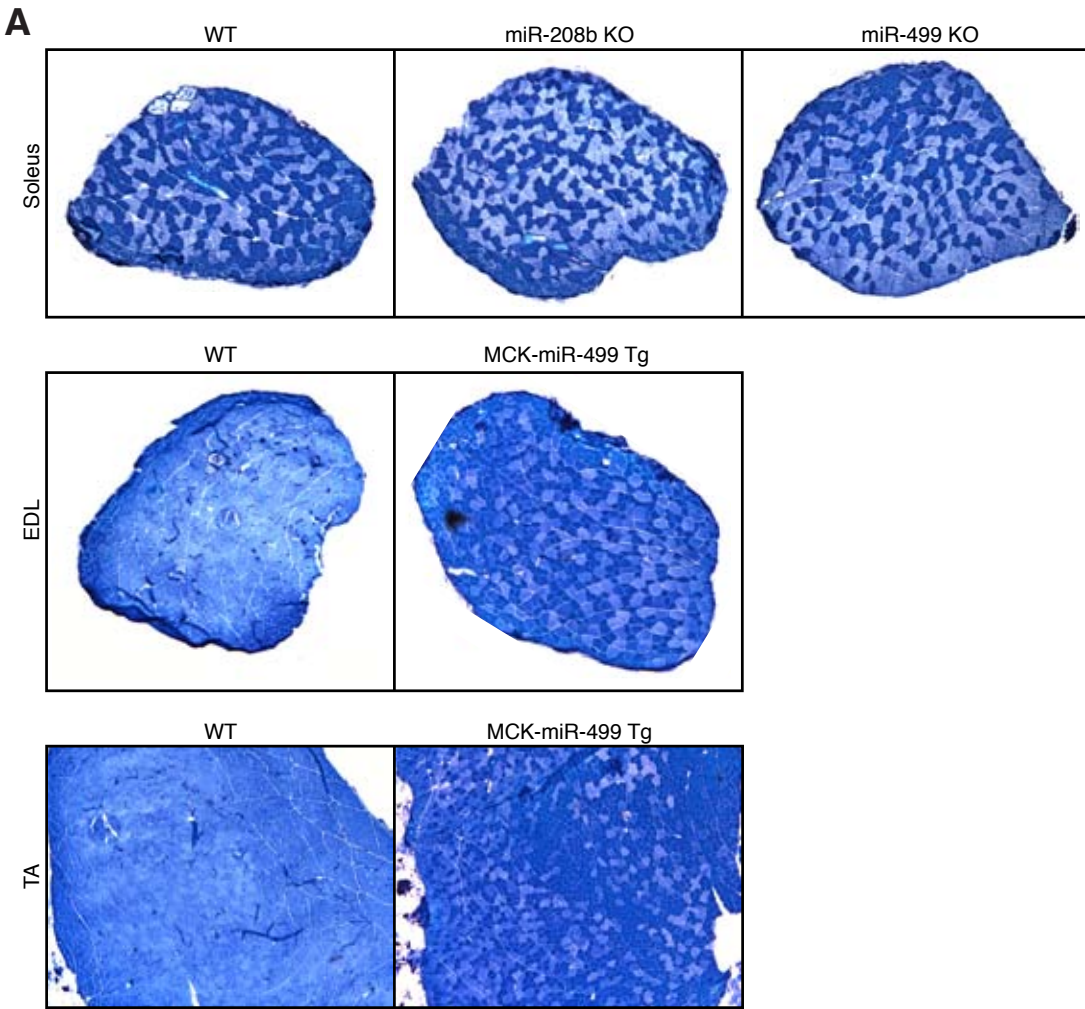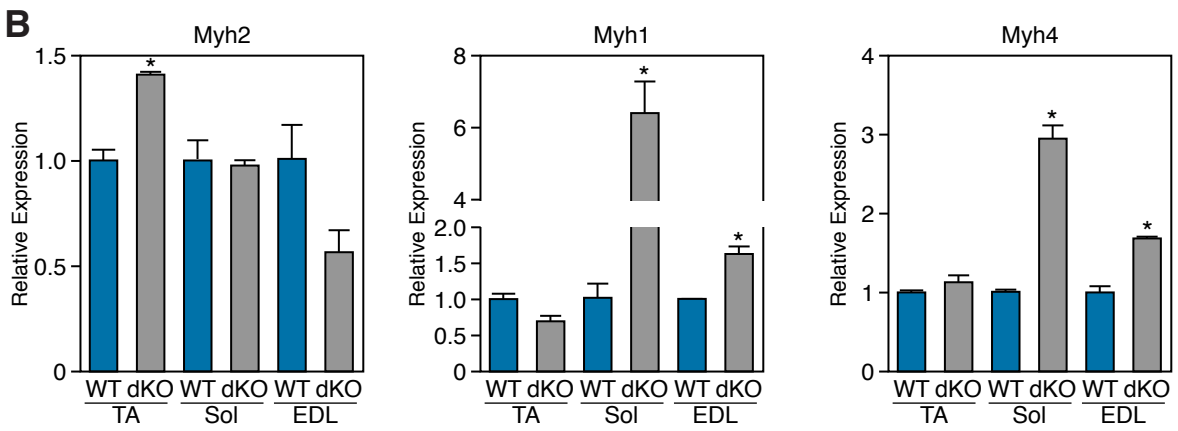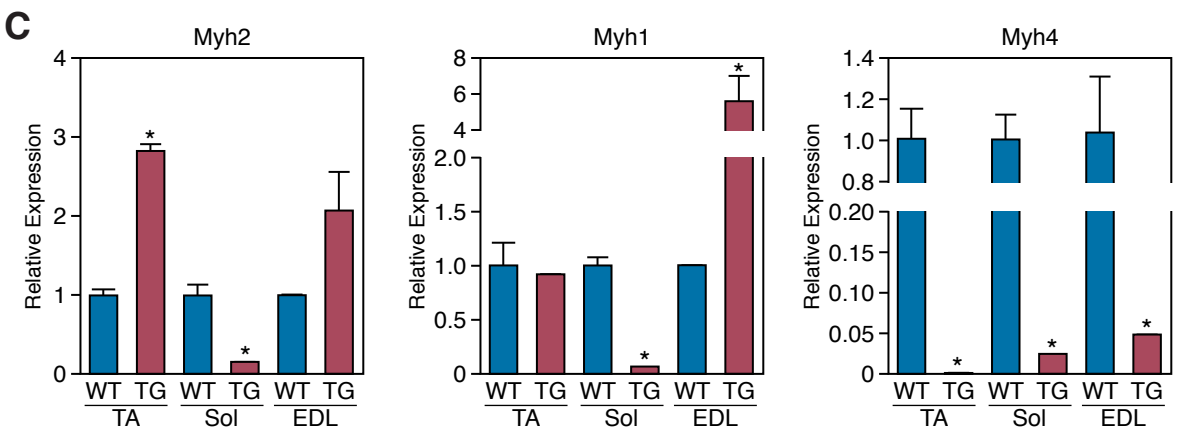

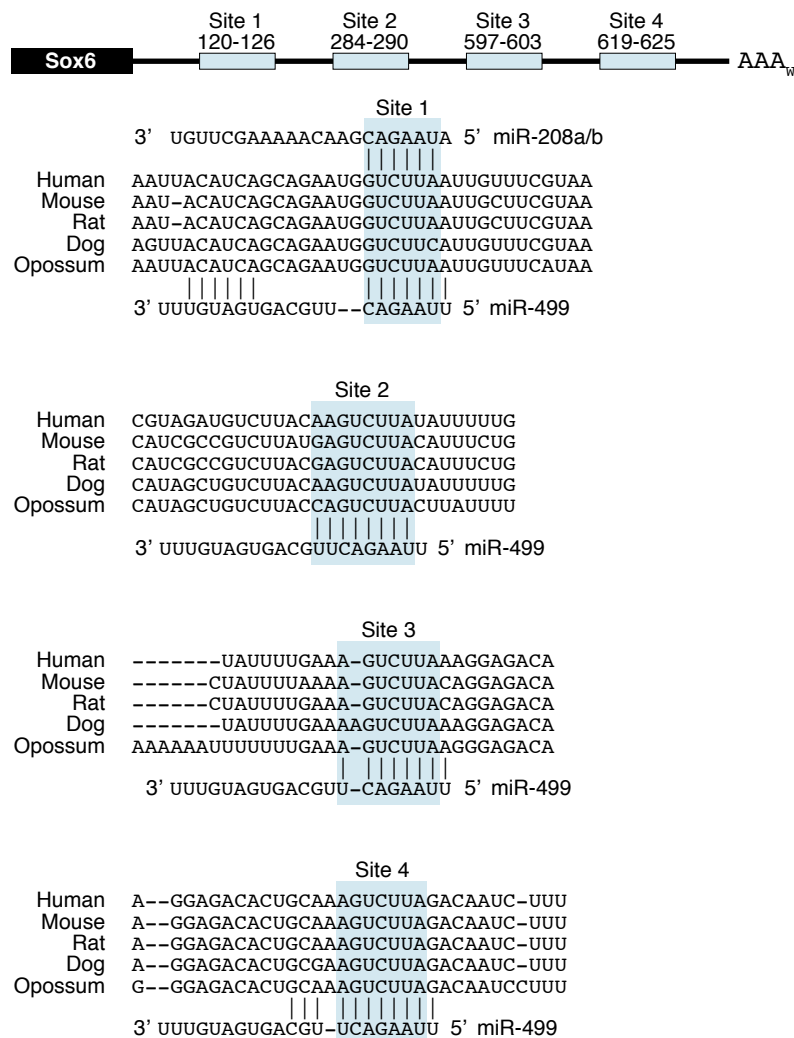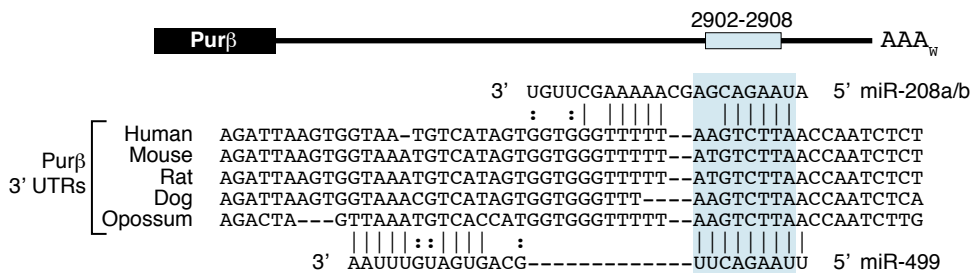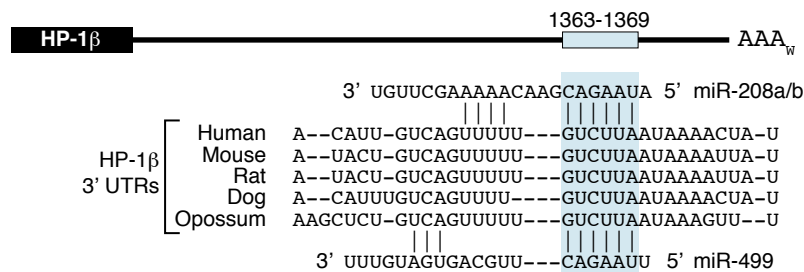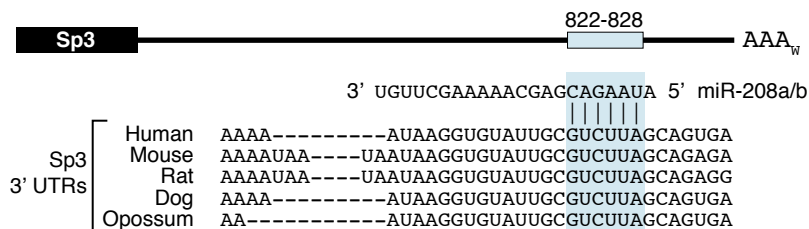

Supplement: NIHMS157407-supplement-01.pdf [file NIHMS157407-supplement-01.pdf]
